# Supplementary material for: A NIR-responsive indocyanine green-genistein nanoformulation to control the polycomb epigenetic machinery for the efficient combinatorial photo/chemotherapy of glioblastoma
Source: PubMed Central journal article supplement (PMC9419092; doi:10.1039/c9na00212j), 2019-04-16
Supplement: NA-001-C9NA00212J-s001.pdf [file NA-001-C9NA00212J-s001.pdf]

## Supporting information

### **NIR-responsive Indocyanine Green-Genistein Nanoformulation Controlling Polycomb Epigenetic Machinery for Efficient Photo-Chemo-Combotherapy of Glioblastoma**

Babita Kaundal,<sup>a</sup> Anup K. Srivastava,<sup>a</sup> Mohammed Nadim Sardoiwala,<sup>a</sup> Surajit Karmakar<sup>a</sup> and Subhasree Roy Choudhury,<sup>\*a</sup>

| Run | Protein conc. (%) | Acetone conc. (%) | Stirring rate (rpm) | Particle size (nm) | PDI  |
|-----|-------------------|-------------------|---------------------|--------------------|------|
| 1   | 1.00              | 90.00             | 1200.00             | 206.5              | 0.43 |
| 2   | 1.00              | 80.00             | 1800.00             | 192.74             | 0.35 |
| 3   | 1.50              | 90.00             | 1800.00             | 156.86             | 0.27 |
| 4   | 0.50              | 80.00             | 1200.00             | 236.1              | 0.51 |
| 5   | 1.00              | 80.00             | 600.00              | 185.76             | 0.35 |
| 6   | 1.00              | 100.00            | 1800.00             | 127.1              | 0.35 |
| 7   | 1.00              | 90.00             | 1200.00             | 211.86             | 0.37 |
| 8   | 1.00              | 100.00            | 600.00              | 173.66             | 0.34 |
| 9   | 1.00              | 90.00             | 1200.00             | 211.4              | 0.38 |
| 10  | 1.50              | 90.00             | 600.00              | 232                | 0.32 |
| 11  | 1.50              | 100.00            | 1200.00             | 197.08             | 0.36 |
| 12  | 0.50              | 100.00            | 1200.00             | 143.16             | 0.43 |
| 13  | 1.00              | 90.00             | 1200.00             | 211.4              | 0.38 |
| 14  | 0.50              | 90.00             | 1800.00             | 198.06             | 0.43 |
| 15  | 0.50              | 90.00             | 600.00              | 160.46             | 0.41 |
| 16  | 1.50              | 80.00             | 1200.00             | 259.06             | 0.39 |
| 17  | 1.00              | 90.00             | 1200.00             | 226.03             | 0.42 |

**Table S1:** Reaction trials with the variables

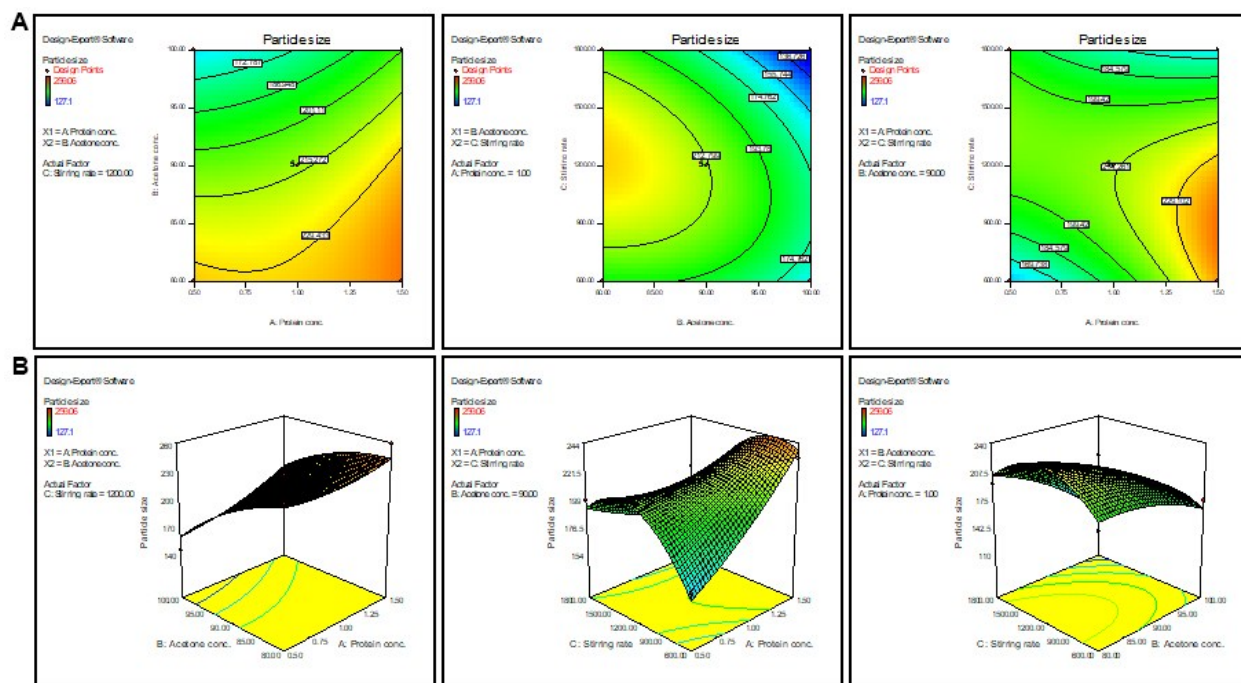

**Figure. S1** 2D Contour plots showing pattern among the variables(A); 3D response plots showing interaction among the variables(B).

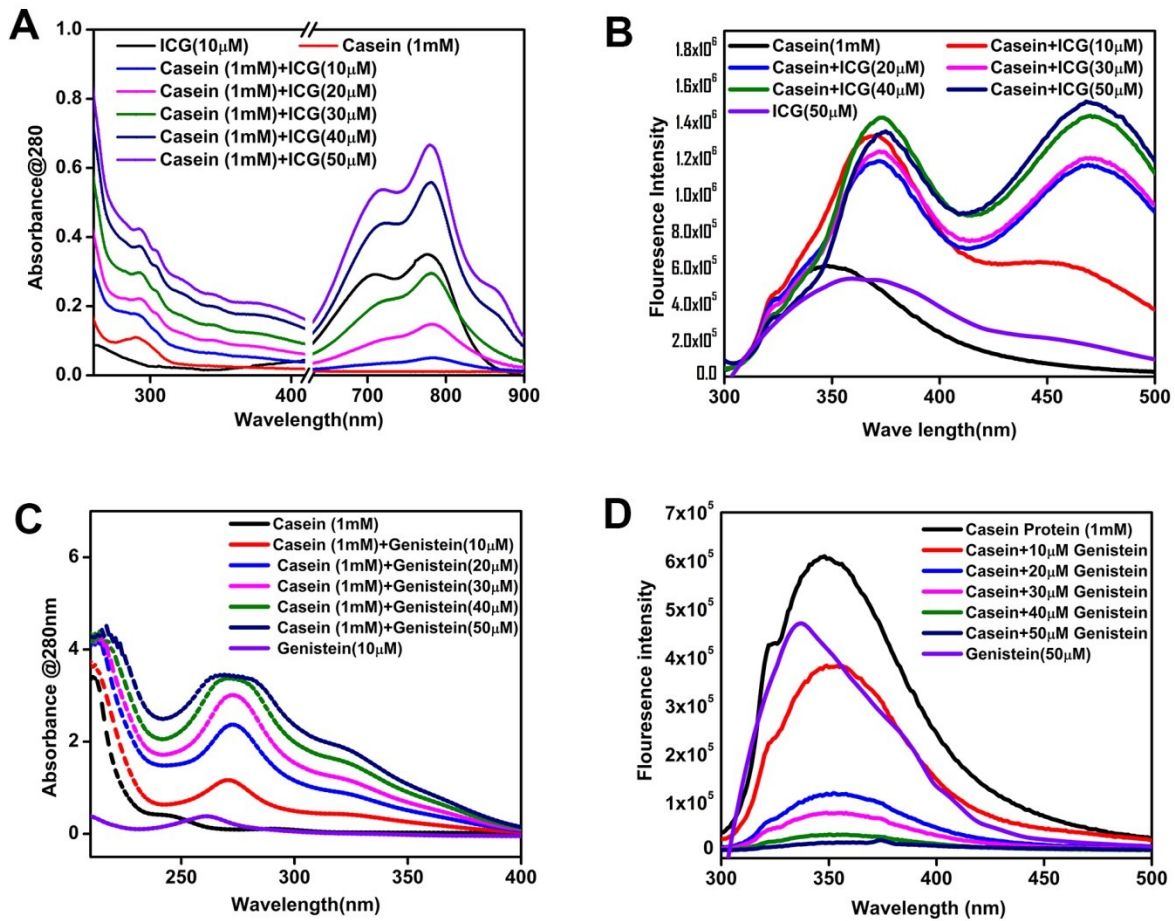

**Figure S2.** UV Visible Spectroscopic data representing the physical interactions of casein and ICG , casein and genistein enhancing the native absorbance of protein at  $\lambda_{\text{max}}=280$  nm (Shown via black arrow) (A and C); fluorescence spectroscopy data representing the physical interactions of casein and ICG, Casein and genistein quenching the native Florescence of protein at  $\lambda_{\text{max}}=280$  nm (B and D).

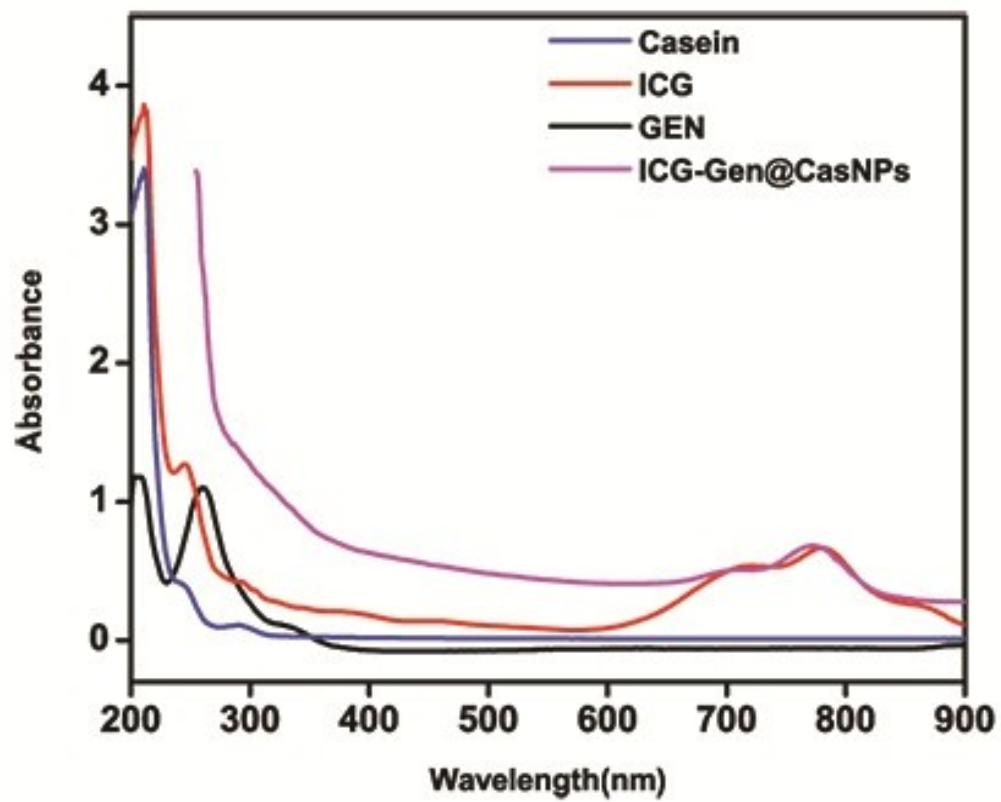

**Figure S3.** UV-Vis spectra of Casein, ICG, GEN and ICG-Gen@CasNPs.

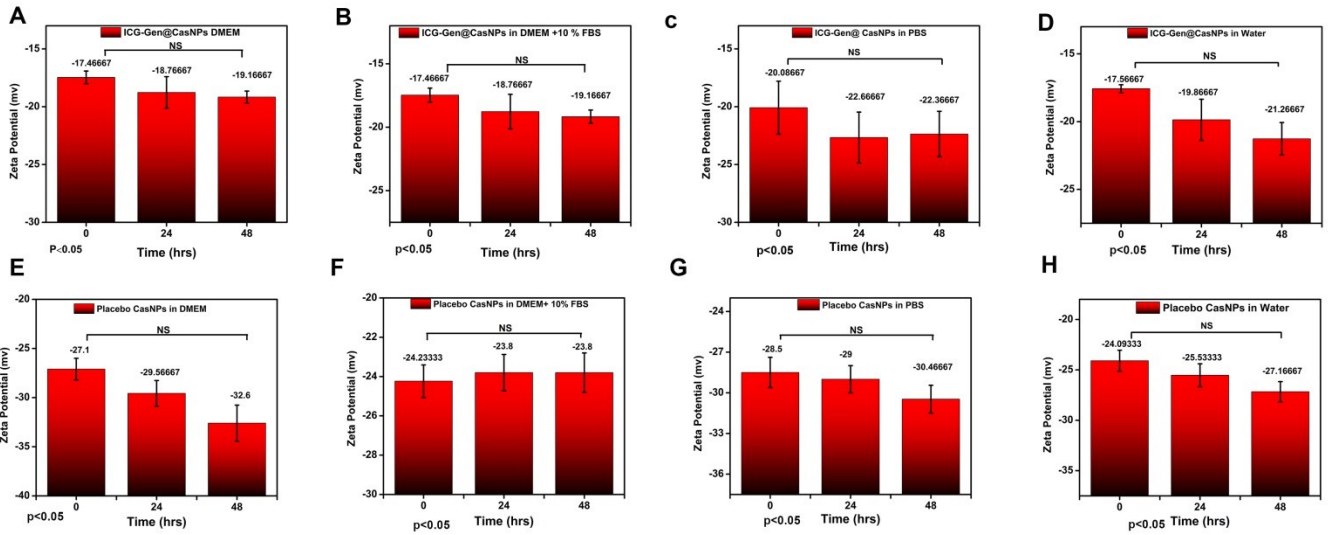

**Figure S4** The histogram showing the Zeta potential value of ICG-Gen@CasNPs (A,B,C,D) and Placebo CasNPs (E,F,G,H) in DMEM and DMEM +10% FBS , PBS, Water respectively. The zeta potential statistically same till 48 hrs observed via one way ANOVA with Tukey test at significant level of  $P \leq 0.05$  ( $n=3$ ).

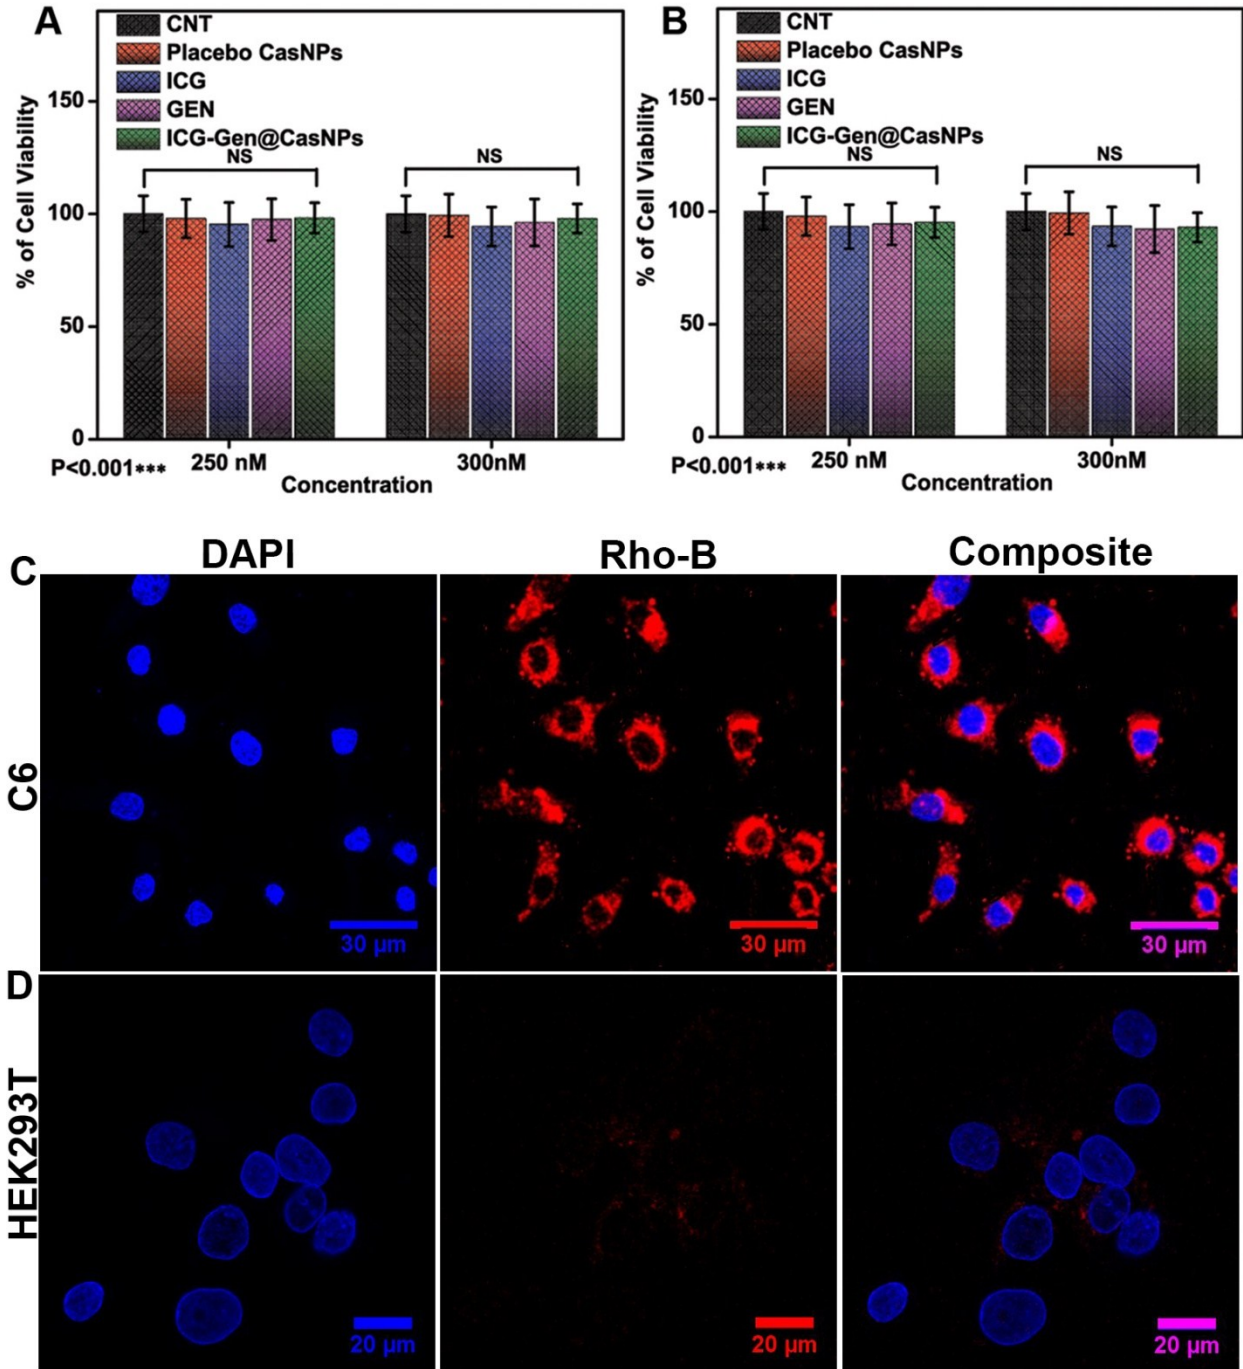

**Figure S5.** Cellular viability assay showing in HEK293T cells with different dose control, placebo CasNPs, Genistein, ICG, ICG-Gen@CasNPs without NIR light (A) and with NIR light

(B); Cellular uptake of Rhodamine B tagged Nanoparticle showing in C6 cell line (C); and in HEK293T(D).

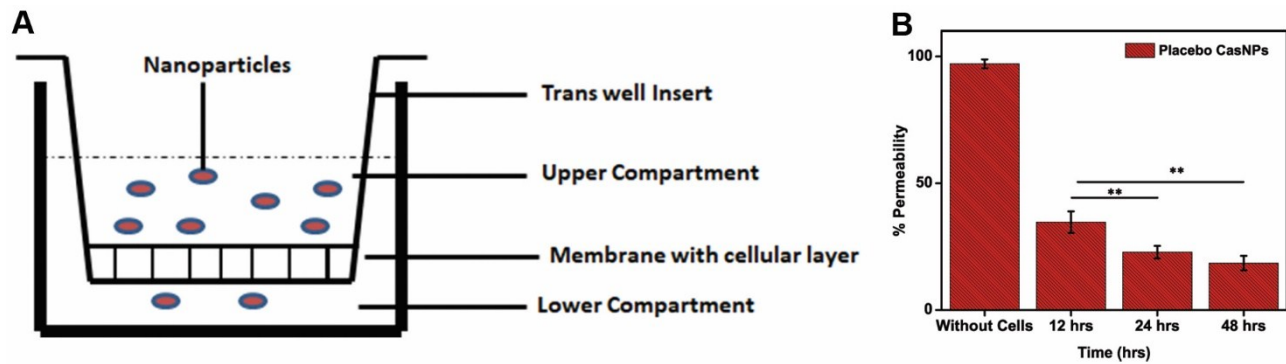

**Figure S6.** The *in-vitro* trans well model mimicking BBB and permeability assay of ICG-Gen@CasNPs. (A) representation of basic procedure of trans well separating luminal side (luminal side) and brain side (lower chamber) separated by endothelial cell monolayer. (B) the normalized fluorescence intensity of the particle present in the lower chamber at 12 hr, 24hr and 48 hr relative to particles passed through insert contain no cells.



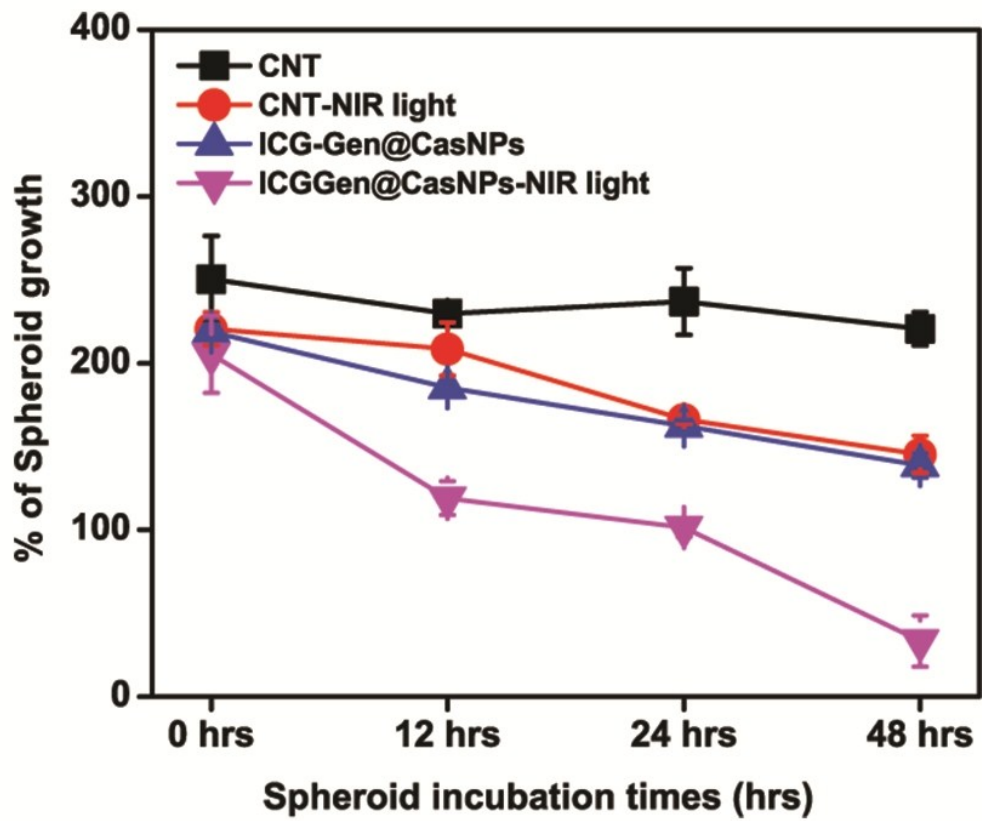

**Figure S7.** The *in-vitro* 3D glioma spheroids treated with ICG-Gen@CasNPs and ICG-Gen@CasNPs+NIR indicating excellent disruption in 48 hrs.
